# Supplementary material for: Clinical validation of a novel quantitative assay for the detection of MGMT methylation in glioblastoma patients
Source: PubMed Central journal article supplement (PMC7941980; doi:10.1186/s13148-021-01044-2), 2021-03-09
Supplement: 13148_2021_1044_MOESM3_ESM.pdf [file 13148_2021_1044_MOESM3_ESM.pdf]

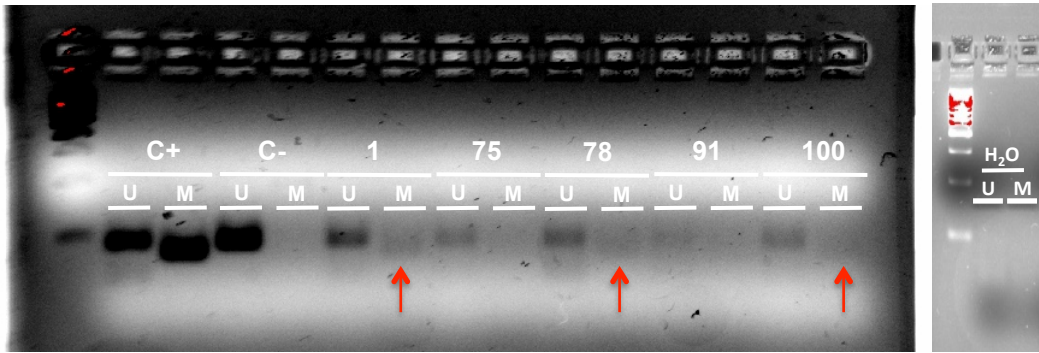

**Supplementary Figure 3.** Agarose gel with the MGMT promoter amplification of five samples with discrepancies between MSP and dp\_qMSP. It has been performed in a collaborative center (MD Anderson Madrid) with an alternative methodology using EpiTec for DNA modification and using the next primers and conditions for PCR amplification:

MGMT-M-F TTTTCGACGTTTCGTAGGTTTTTCGC and MGMT-M-R GCACTCTCCGAAAACGAAAC  
 MGMT-U-F TTTGTGTTTTGATGTTTGTAGGTTTTTGT and MGMT-U-R AACTCCACTCTTCAAAAAACAAAACA

For both reactions the PCR settings are 58°C and 35 cycles.

The arrows indicate a slightly amplification at the methylation reaction in samples 1, 78 and 100. For none of those patients these results were considered positive for clinical diagnosis
